# Supplementary material for: Reliability of a Qualitative Instrument to Assess High-Risk Mechanisms during a 90° Change of Direction in Female Football Players
Source: MDPI journal article supplement (doi:10.3390/ijerph19074143), 2022-03-31

## MANUAL ANÁLISIS "CUTTING MOVEMENT ASSESSMENT SCORE (CMAS)" EN COD 90º (side-step)

### Penúltimo contacto previo al COD (PFC)

| Sagital                                                                                                                                                                                                                                 | Clara estrategia de deceleración en el penúltimo contacto (en el momento del contacto inicial) | Nota explicativa                                            |
|-----------------------------------------------------------------------------------------------------------------------------------------------------------------------------------------------------------------------------------------|------------------------------------------------------------------------------------------------|-------------------------------------------------------------|
| <ul style="list-style-type: none"> <li>Inclinación del tronco hacia atrás</li> <li>Gran distancia desde el COM al COP- posición anterior del pie</li> <li>Deceleración efectiva – contacta el talón en el penúltimo contacto</li> </ul> |                                                                                                | Para marcar "Sí" debe cumplir los tres puntos especificados |
| Sí=0                                                                                                                                                                                                                                    | No=1                                                                                           |                                                             |

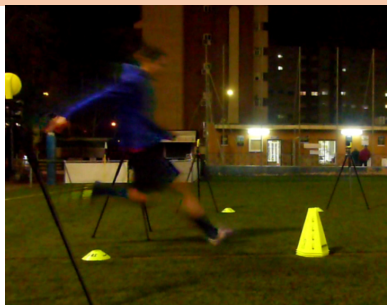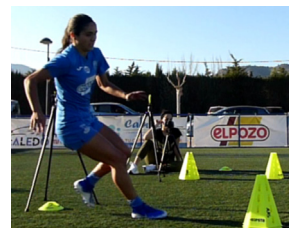

\*No muestra inclinación del tronco hacia atrás

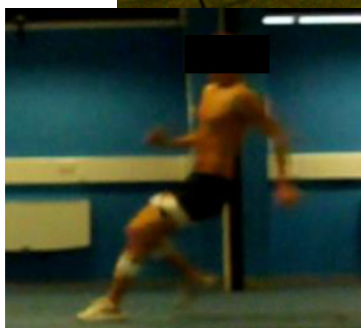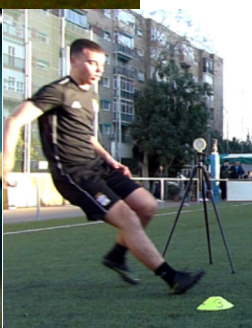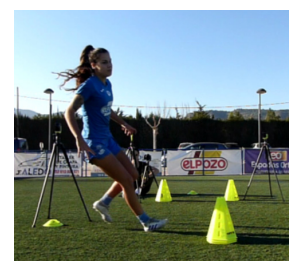

\*La distancia COM-COP es pequeña y no hay inclinación del tronco hacia atrás

### Contacto final previo al COD (FFC)

| Frontal                                                                                                                                                             | Gran amplitud en el apoyo lateral (en el momento del contacto inicial) | Nota explicativa                                                                                                                                                                       |
|---------------------------------------------------------------------------------------------------------------------------------------------------------------------|------------------------------------------------------------------------|----------------------------------------------------------------------------------------------------------------------------------------------------------------------------------------|
| <ul style="list-style-type: none"> <li>Aprox. &gt; 0.35 m – dependiendo de la antropometría del sujeto (si es niño o es muy bajito cambiar a &gt;0.25 m)</li> </ul> |                                                                        | Se considera una gran amplitud en el apoyo lateral cuando la distancia entre la cadera (de la pierna de apoyo) y el pie de apoyo es mayor a 0,35 m en el momento del contacto inicial. |
| Sí=2                                                                                                                                                                | No=0                                                                   |                                                                                                                                                                                        |

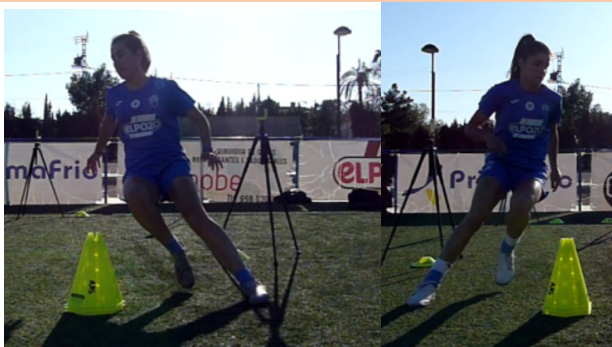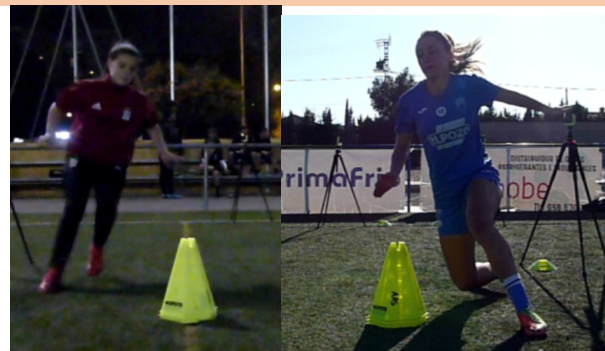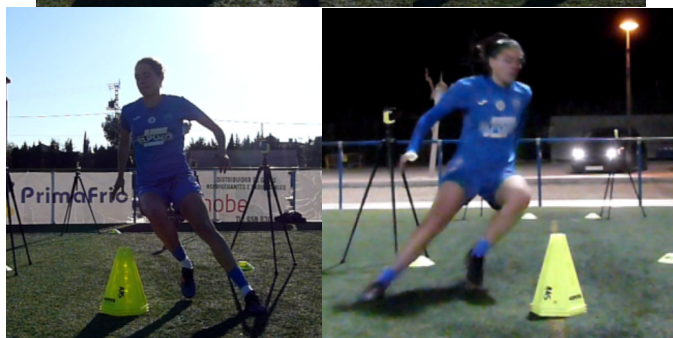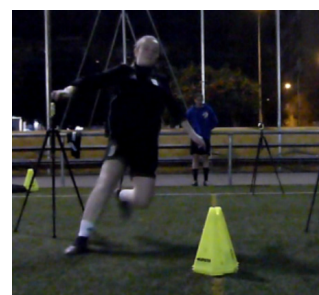

| Frontal                                                                                             | Cadera en posición de rotación interna inicial (en el momento del contacto inicial) | Nota explicativa                                                                                                       |
|-----------------------------------------------------------------------------------------------------|-------------------------------------------------------------------------------------|------------------------------------------------------------------------------------------------------------------------|
| <ul style="list-style-type: none"> <li>Se observa una rotación interna inicial del muslo</li> </ul> |                                                                                     | Se recomienda retroceder a unos frames previos al contacto inicial y observar si se produce rotación interna del muslo |

# MANUAL ANÁLISIS "CUTTING MOVEMENT ASSESSMENT SCORE (CMAS)" EN COD 90º (side-step)

Sí=1

No=0

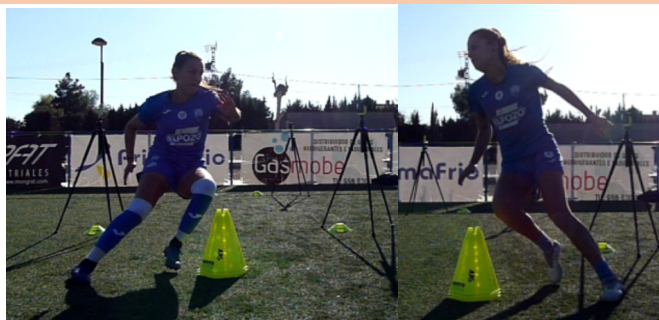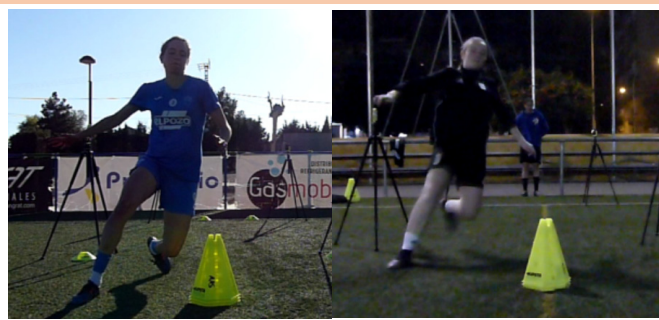

Frontal

**Valgo de rodilla inicial** (en el momento del contacto inicial)

**Nota explicativa**

- Posicionamiento medial de la rodilla en el contacto inicial

Si hay duda, puede tomarse como referencia el ángulo FPPA (FPPA < 170º)

Sí=1

No=0

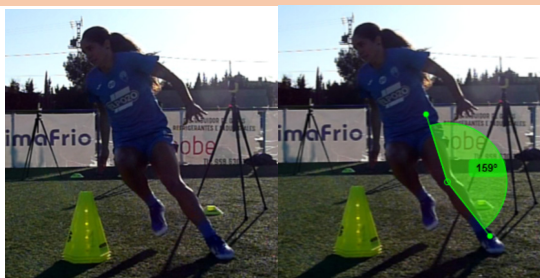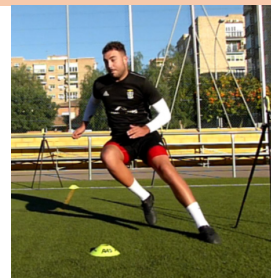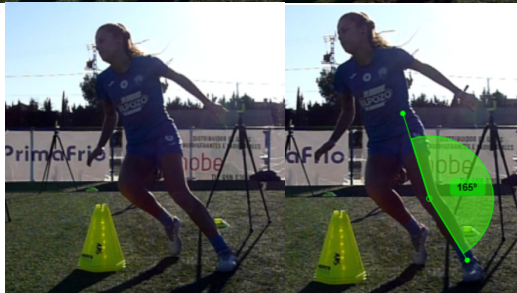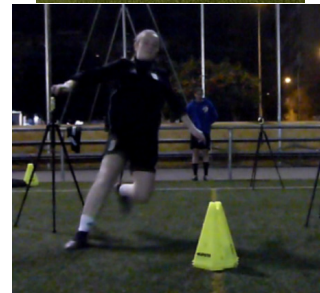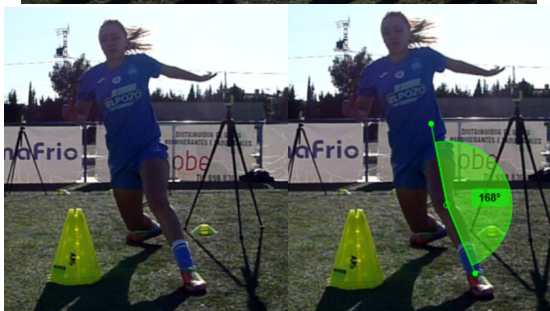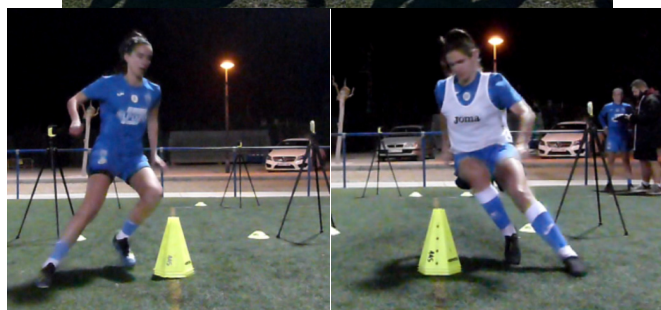

Frontal/Sag.

**El pie no está orientado en posición neutra** (en el momento del contacto inicial)

**Nota explicativa**

- Se produce rotación interna o externa del pie (en relación a la dirección del recorrido inicial de la primera fase de carrera)

Puede trazarse una línea de referencia para marcar la dirección del recorrido inicial de la carrera

Sí=1

No=0

# MANUAL ANÁLISIS "CUTTING MOVEMENT ASSESSMENT SCORE (CMAS)" EN COD 90º (side-step)

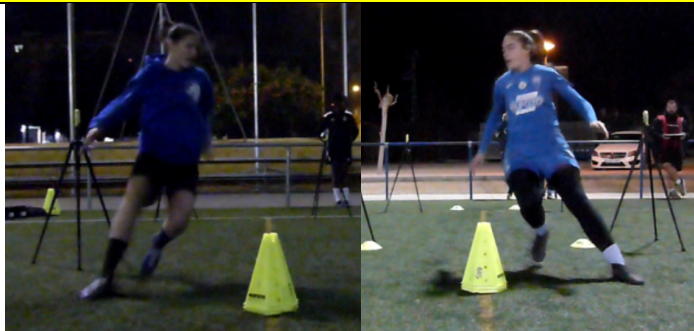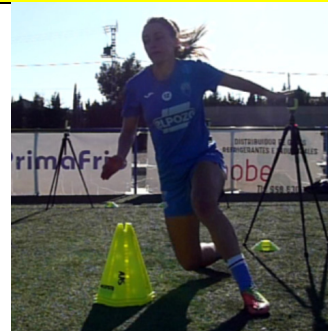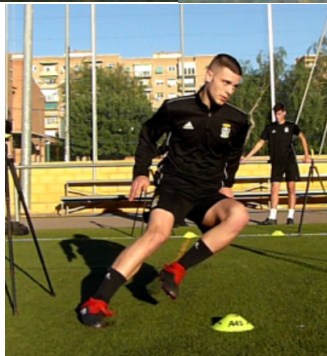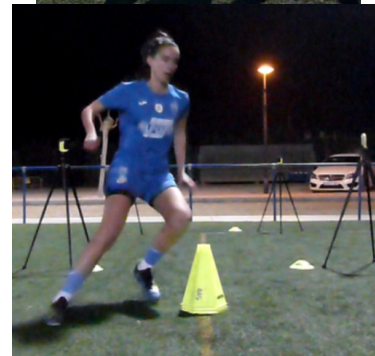

## Frontal

Posición frontal del tronco con relación a la nueva dirección de carrera (en el momento del contacto inicial y a lo largo de la fase WA)

- Lateral (L) o tronco rotado (TR) hacia la pierna de apoyo
- Upright (U) o erguido, en vertical
- Medial (M) o hacia la nueva dirección de carrera

L=2

## Nota explicativa

Puede usarse la posición de los hombros como guía (trazar una línea de referencia en kinovea)

U=1

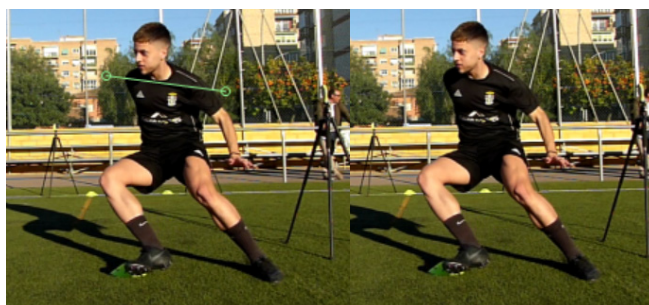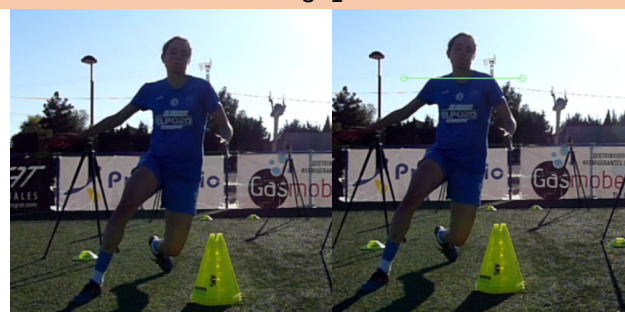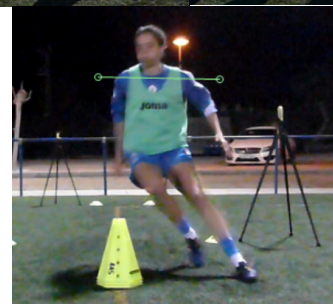

TR=2

M=0

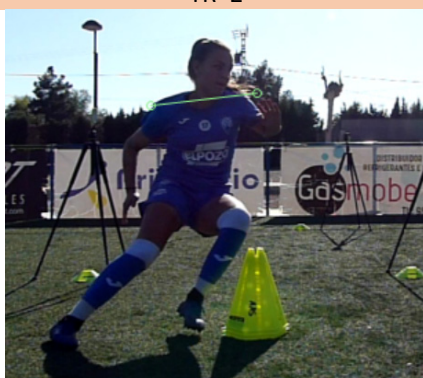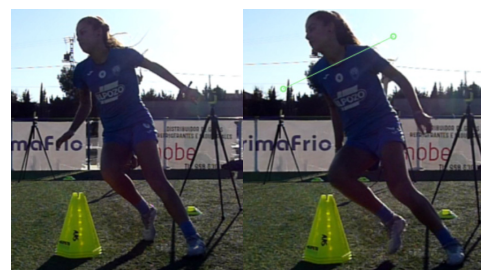

## Sagital

Tronco hacia atrás o vertical a lo largo del contacto final (a lo largo de la fase WA)

## Nota explicativa

## MANUAL ANÁLISIS "CUTTING MOVEMENT ASSESSMENT SCORE (CMAS)" EN COD 90º (side-step)

- Si el tronco permanece inclinado hacia atrás o vertical durante el contacto final, quiere decir que el desplazamiento del tronco en flexión no es adecuado

Sí=1

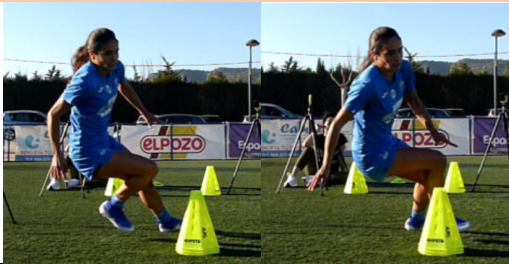

Para puntuar "No" debe observarse claramente que el tronco se desplaza hacia adelante a lo largo del FFC (situándose el COM sobre el COP).

No=0

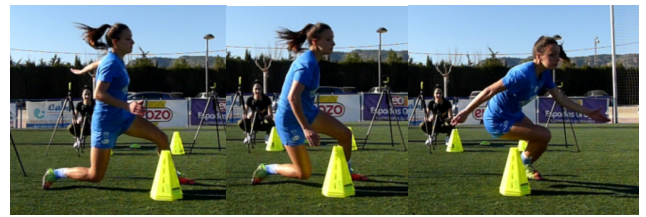

Sagital

**Flexión limitada de la rodilla durante el contacto final (a lo largo de la fase WA)**

- Flexión de rodilla  $\leq 30^\circ$  (rigidez-no amortigua carga)

Sí=1

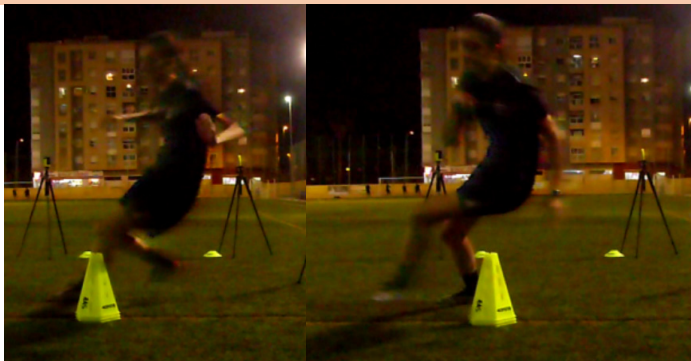

**Nota explicativa**

Para puntuar "No" debe observarse una clara flexión de rodilla (de la pierna de apoyo) a lo largo del FFC

No=0

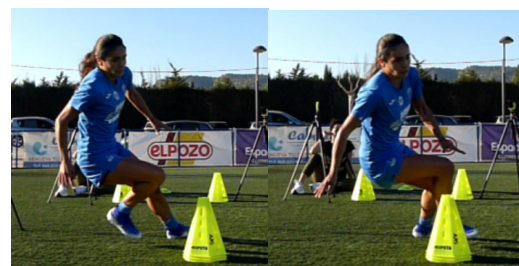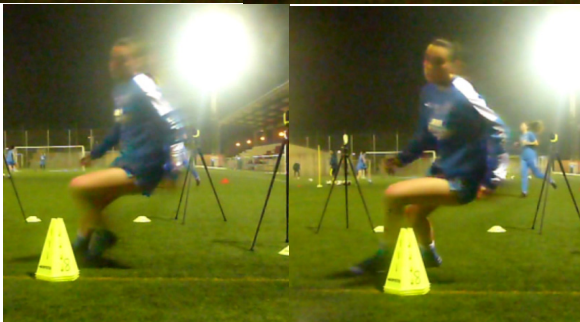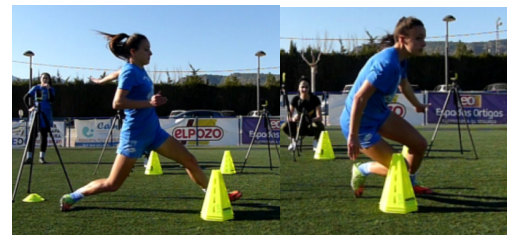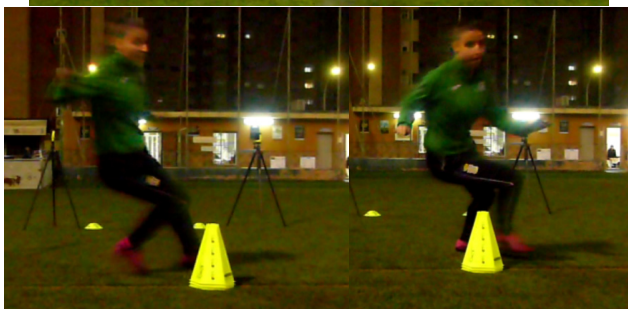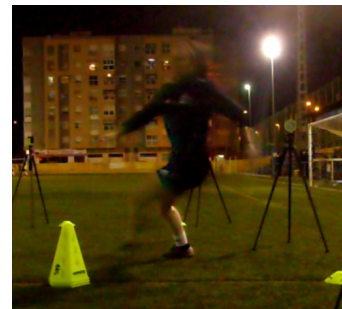

Frontal

**Excesivo movimiento de la rodilla en valgo durante el contacto final (a lo largo de la fase WA)**

- Desplazamiento medial de la rodilla a lo largo del FFC

Sí=1

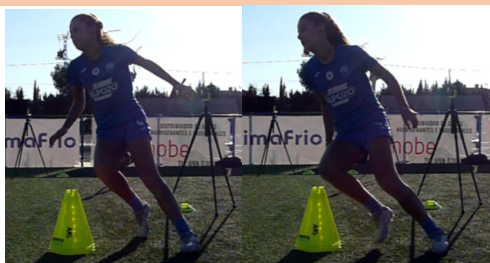

**Nota explicativa**

Para puntuar "Sí" debe observarse un claro desplazamiento de la rodilla en valgo durante el FFC. En caso de duda, podemos trazar el FPPA al inicio y cuando se observe el mayor valgo

No=0

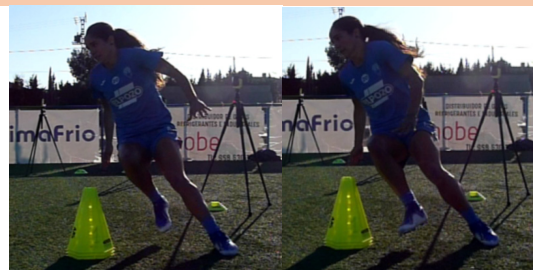

# MANUAL ANÁLISIS "CUTTING MOVEMENT ASSESSMENT SCORE (CMAS)" EN COD 90º (side-step)

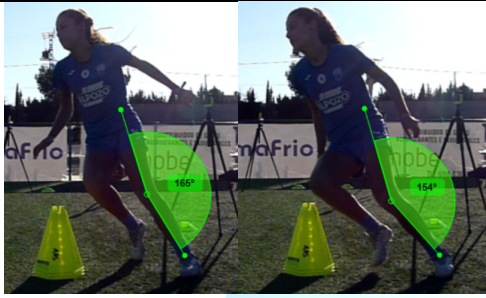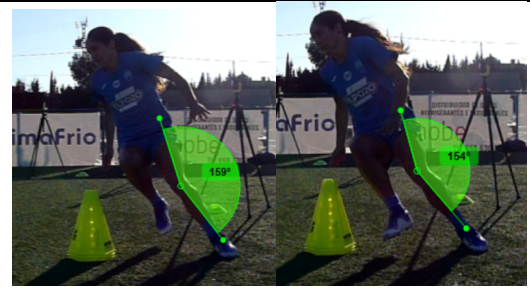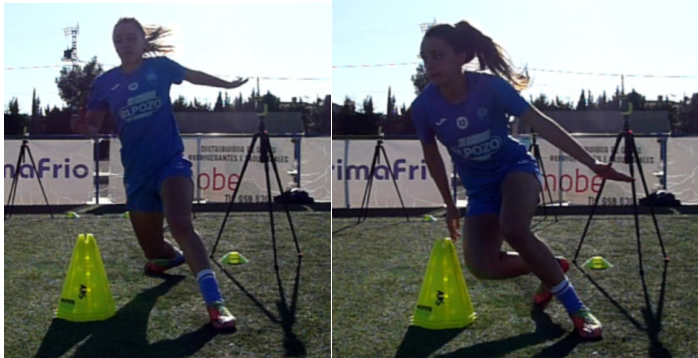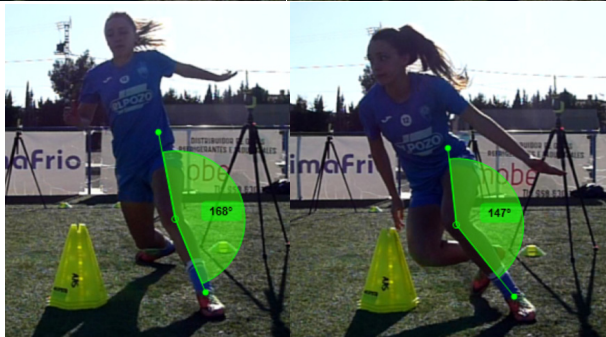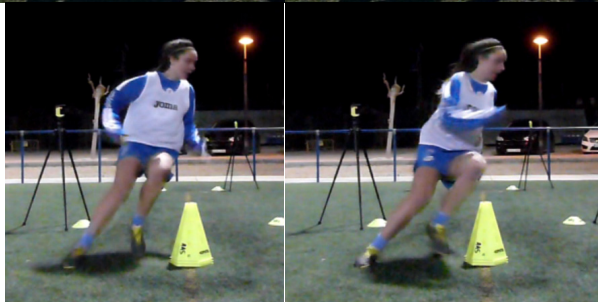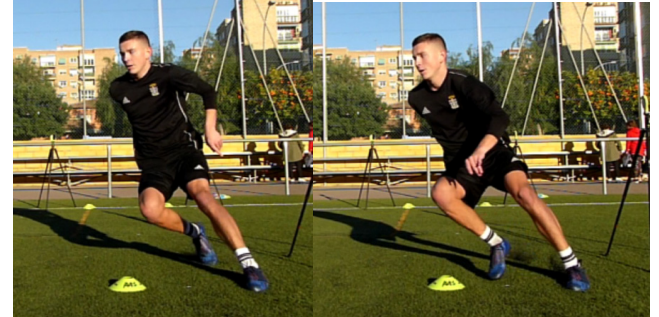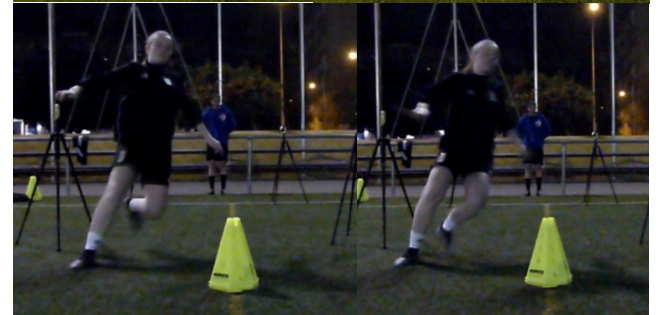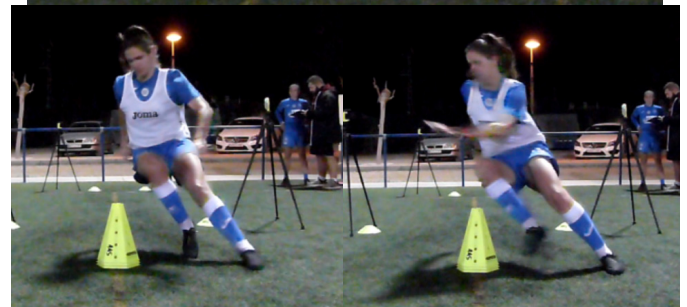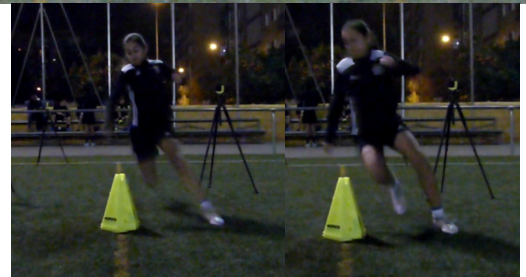

Total Score

/11

\*Key = PFC: Penultimate foot contact; COM: Centre of mass; COP: Centre of pressure; WA: Weight acceptance phase; TR: Trunk rotation; Y: Yes; N: No; L: Lateral; U: Upright; M: Medial.

La visualización de los vídeos se llevará a cabo a través de kinovea (versión 8.15). Se recomienda la visualización de la vista frontal y de la vista sagital a la vez. Los vídeos pueden visualizarse tantas veces como se requiera. Si existe duda, se aconseja optar siempre por la opción más conservadora.

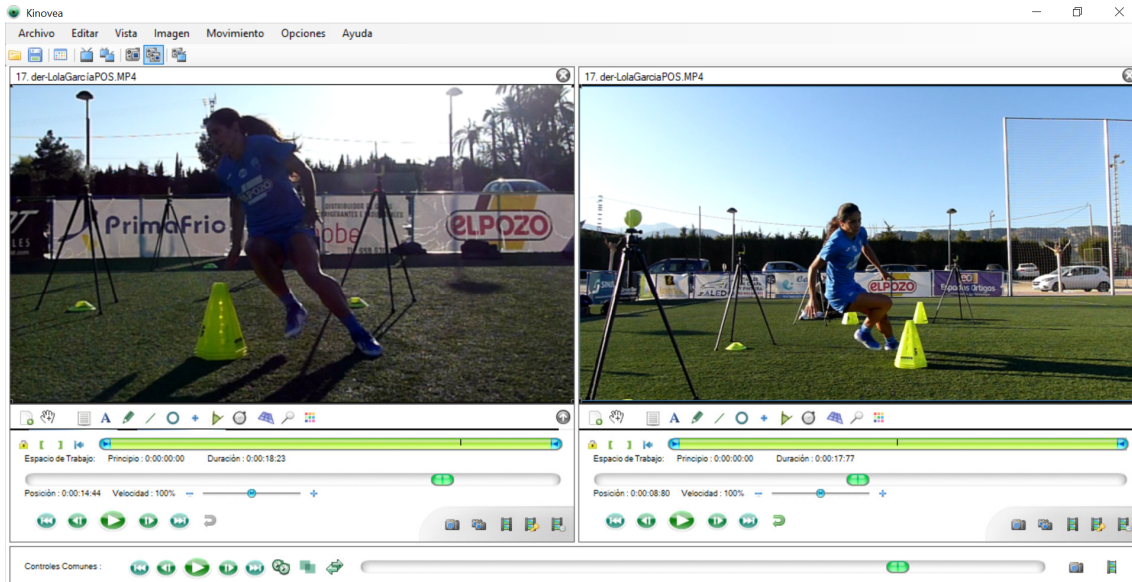

Supplement: s1 [file s1]
